# Supplementary material for: A hybrid hydrogel system composed of CdTe quantum dots and photonic crystals for optical anti-counterfeiting and information encoding–decoding
Source: Royal Society of Chemistry journal article supplement (doi:10.1039/d1tc05948c), 2022-01-01
Supplement: d1tc05948c1.pdf [file d1tc05948c1.pdf]

**Electronic Supplementary Information**

**Hybrid hydrogel system composed of CdTe quantum dots  
and photonic crystals for optical anti-counterfeiting and  
information encoding-decoding**

Guoyi Pan<sup>a</sup>, Jingye Yan<sup>a</sup>, Zilun Tang<sup>a</sup>, Jieheng Zhang<sup>a</sup>, Xiaofeng Lin<sup>a</sup>, Dongpeng  
Yang<sup>b</sup>, Jianyu Wu<sup>a</sup>, Wenjing Lin<sup>\*a</sup>, Guobin Yi<sup>\*a</sup>

<sup>a</sup>*School of Chemical Engineering and Light Industry, Guangdong University of  
Technology, Guangzhou 510006, PR China*

<sup>b</sup>*School of Materials and Energy, School of Physics and Optoelectric Engineering,  
Guangzhou Key Laboratory of Low-Dimensional Materials and Energy Storage  
Devices, Guangdong University of Technology and Synergy Innovation Institute of  
GDUT, Guangzhou 510006, P. R. China*

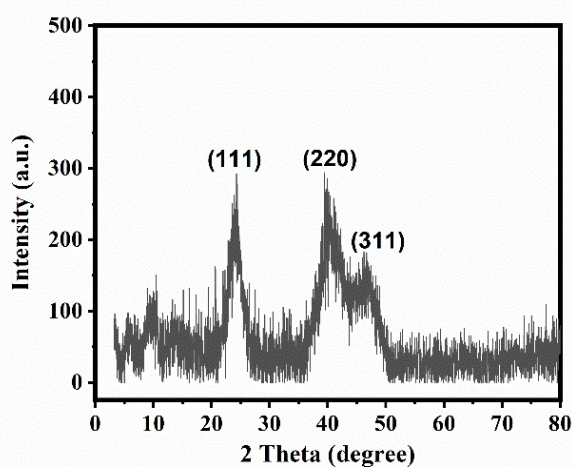

**Fig. S1** XRD pattern of CdTe QDs.

**Table S1** The particle size,  $\lambda_{\text{abs}}$  and PL of CdTe QDs.

| Samples | Size (nm) | $\lambda_{\text{abs}}$ (nm) | PL(nm) |
|---------|-----------|-----------------------------|--------|
| CdTe1   | 2.29      | 498                         | 554    |
| CdTe2   | 2.93      | 527                         | 578    |
| CdTe3   | 3.32      | 558                         | 604    |
| CdTe4   | 3.55      | 587                         | 624    |

**Table S2** The IQE,  $I_{\text{abs}}$ , and EQE of CdTe QDs.

| Samples | IQE(%) | $I_{\text{abs}}$ (%) | EQE(%) |
|---------|--------|----------------------|--------|
| CdTe1   | 20.39  | 93.10                | 19.67  |
| CdTe2   | 22.71  | 92.40                | 21.74  |
| CdTe3   | 21.90  | 93.10                | 21.08  |
| CdTe4   | 20.70  | 93.80                | 20.04  |

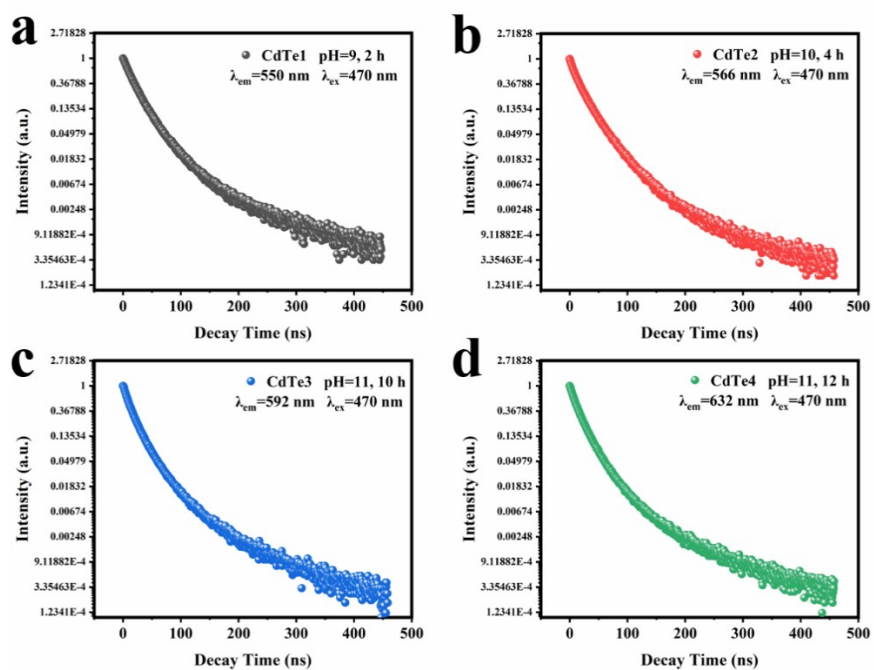

**Fig. S2** Fluorescence decay curves corresponding to four different CdTe QDs at normal temperatures.

The fluorescence decay curve of CdTe QDs was fitted and analyzed by using the second-order exponential formula:

$$I(t) = A_1 \exp(-t/\tau_1) + A_2 \exp(-t/\tau_2) + Y_0$$

Where  $\tau_1$  and  $\tau_2$  are short life and long life, respectively,  $A_1$  and  $A_2$  are pre exponential factors and average life,  $\tau_A$  is:

$$\tau_A = (A_1 \cdot \tau_1^2 + A_2 \cdot \tau_2^2) / (A_1 \cdot \tau_1 + A_2 \cdot \tau_2)$$

**Table S3** The fluorescence lifetime data of CdTe.

| Samples | A1     | A2     | $\tau_1$ (ns) | $\tau_2$ (ns) | $\tau_A$ (ns) |
|---------|--------|--------|---------------|---------------|---------------|
| CdTe1   | 0.6847 | 0.3141 | 14.8469       | 36.7627       | 26.5034       |
| CdTe2   | 0.4464 | 0.5419 | 8.8358        | 28.6260       | 24.6140       |
| CdTe3   | 0.6382 | 0.1382 | 10.2218       | 28.9705       | 22.0257       |
| CdTe4   | 0.6022 | 0.3957 | 10.5097       | 28.6359       | 22.1401       |

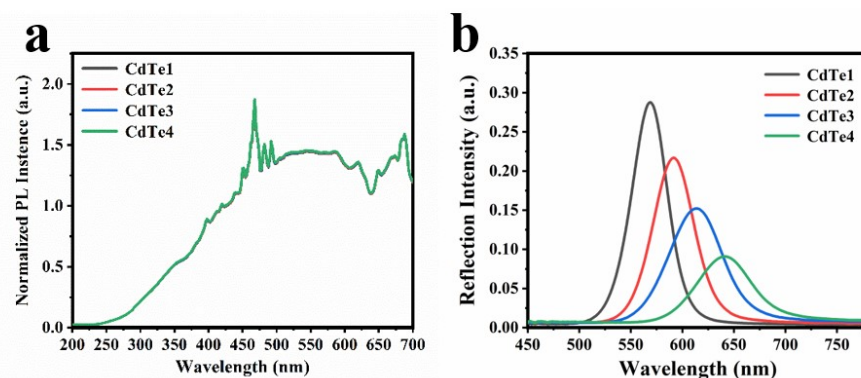

**Fig. S3** Fluorescence excitation spectra (a) and reflective peaks (b) of CdTe QDs.

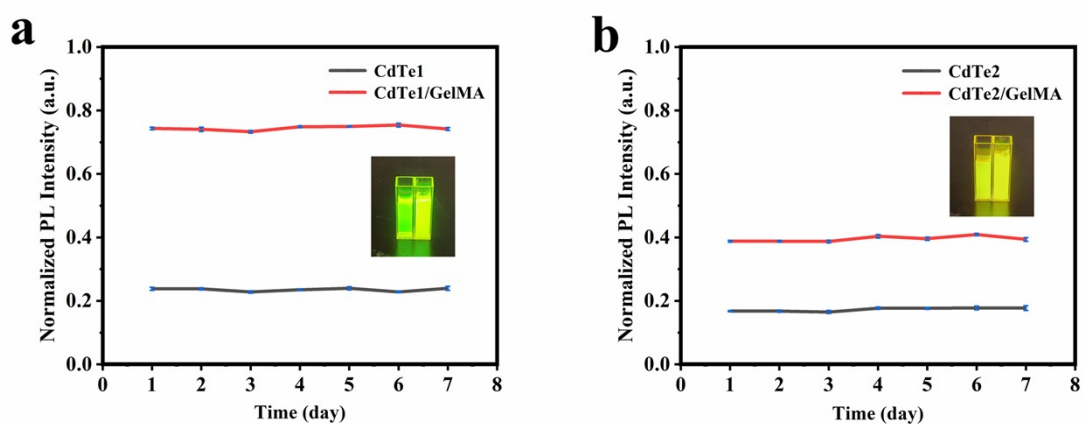

**Fig. S4** (a) Fluorescence stability curves of CdTe1 and CdTe1/GelMA; (b) fluorescence stability curves of CdTe2 and CdTe2/GelMA.

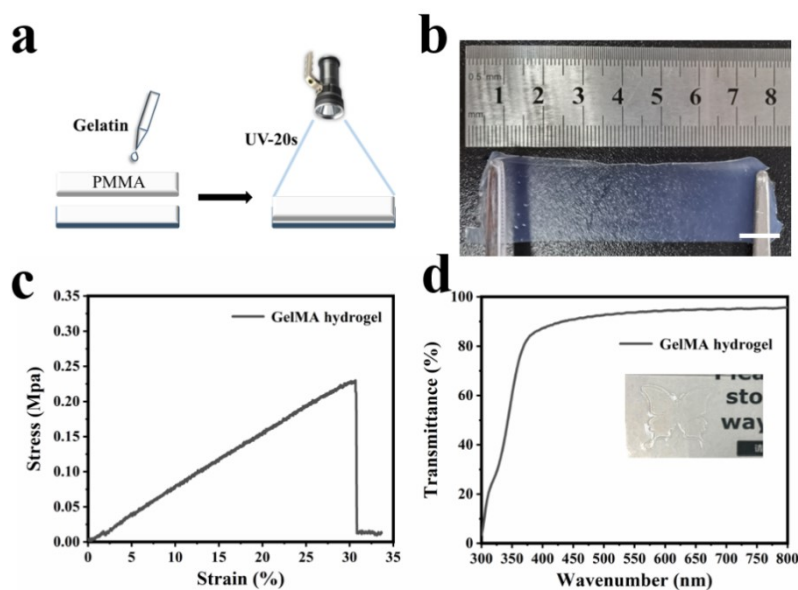

**Fig. S5** The properties of GelMA hydrogel. (a) The forming strategy of GelMA hydrogel; (b) photograph of stretching GelMA hydrogel; (c) tensile test of hydrogel block (2 cm × 6 cm). (d) UV-Vis light transmission spectrum of GelMA hydrogel (butterfly” image).

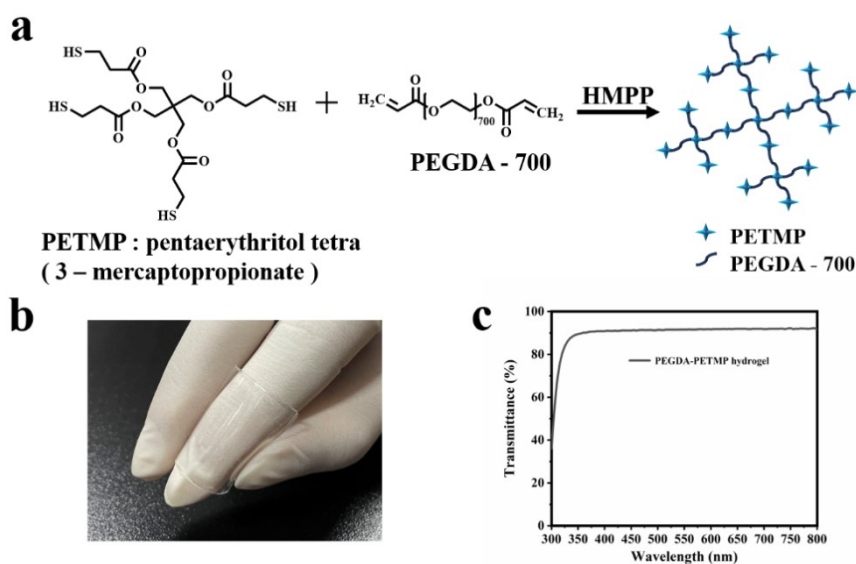

**Fig. S6** The formation and performance of PEGDA-PETMP hydrogel. (a) The synthetic route of PEGDA-PETMP hydrogel; (b) photograph of PEGDA-PETMP hydrogel; (c) UV-Vis transmittance spectrum of PEGDA-PETMP hydrogel.

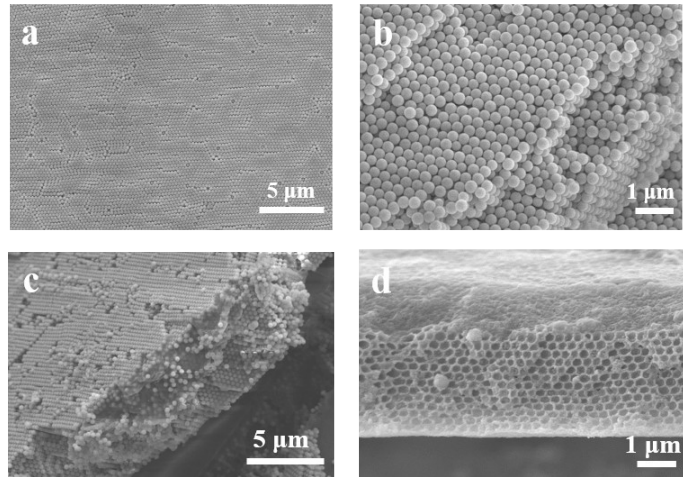

**Fig. S7** (a, b) Surface and cross section of SiO<sub>2</sub> PCs; (c) cross section of PEGDA-PETMP + SiO<sub>2</sub> PCs; (d) cross section of PEGDA-PETMP + air PCs.

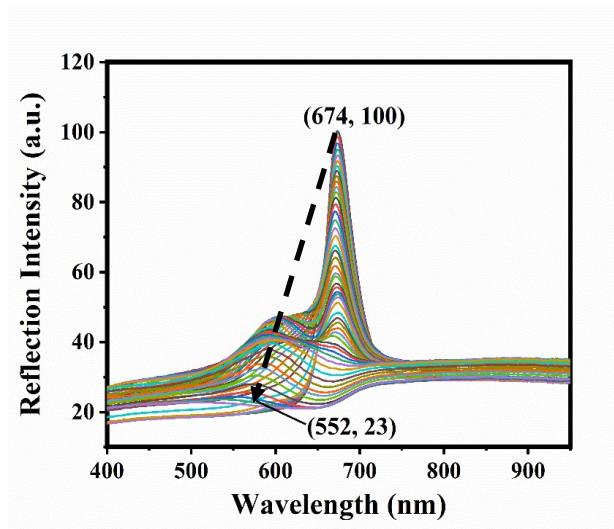

**Fig. S8** Reflection spectra of PEGDA-PETMP + air PCs under water loss process.

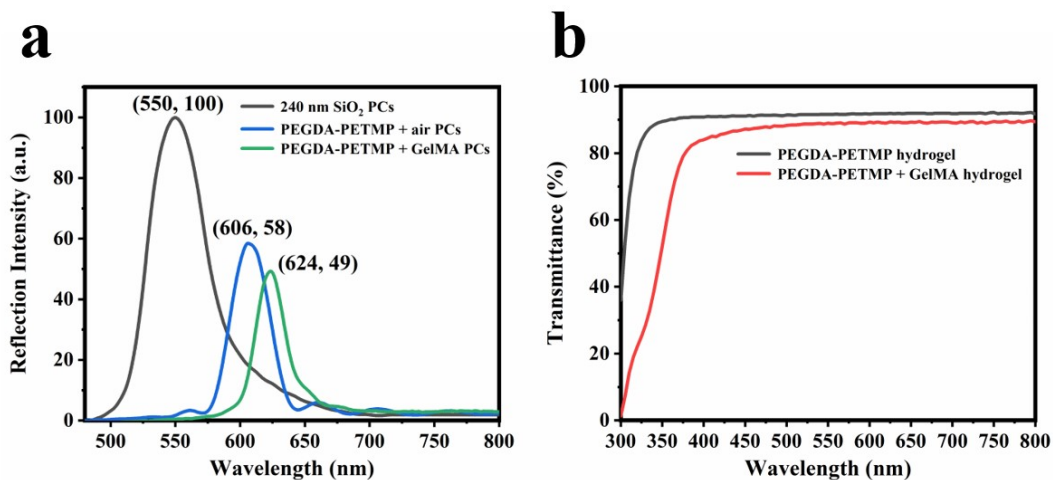

**Fig. S9** (a) Reflection spectra of SiO<sub>2</sub> PCs, PEGDA-PETMP + air PCs, PEGDA-PETMP + GelMA PCs, respectively; (b) UV-Vis transmittance spectra of PEGDA-PETMP hydrogel and PEGDA-PETMP + GelMA.

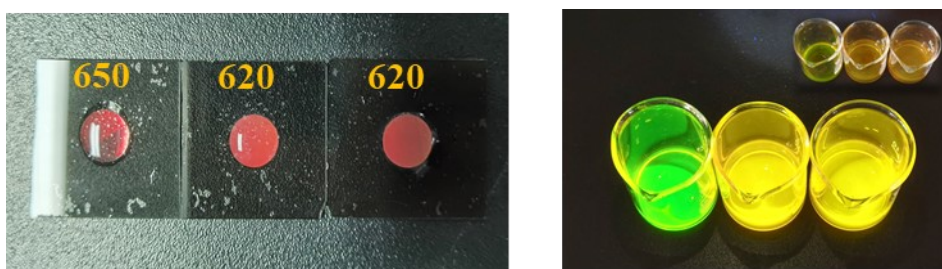

**Fig. S10** (a) 650 nm (left) and two 620 nm (middle and right) PEGDA-PETMP + air PCs; (b) CdTe1/GelMA hydrogel, CdTe2/GelMA hydrogel and CdTe1:CdTe4/GelMA hydrogel respectively.

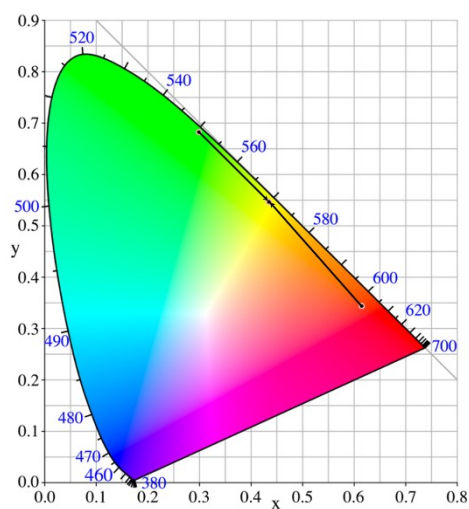

**Fig. S11** CIE image of mixed CdTe1 and CdTe4 (concentration ratio was 1:1).
